# Supplementary material for: Enhanced p62-NRF2 Feedback Loop due to Impaired Autophagic Flux Contributes to Arsenic-Induced Malignant Transformation of Human Keratinocytes
Source: Hindawi journal article supplement (doi:10.1155/2019/1038932), 2019-10-30
Supplement: f1 [file 1038932.f1.pdf]

# Enhanced p62-NRF2 feedback loop due to impaired autophagic flux contributes to arsenic-induced malignant transformation of human keratinocytes

Xiafang Wu <sup>#</sup>, Ru Sun <sup>#</sup>, Huihui Wang, Bei Yang, Fang Wang, Hongtao Xu, Shimin Chen, Rui Zhao, Jingbo Pi, Yuanyuan Xu<sup>\*</sup>

\* Correspondence and request for materials should be addressed to Y.X. (email:

[yyxu@cmu.edu.cn](mailto:yyxu@cmu.edu.cn)).

# The authors contribute equally to this work.

Table S1. Genes and primers for real time RT-PCR

| Gene           | GenBank Accession No.                                                          | Primers (5'→3')                                                  |
|----------------|--------------------------------------------------------------------------------|------------------------------------------------------------------|
| <i>p62</i>     | NM_003900.5, NM_001142299.2 ,<br>NM_001142298.2                                | Forward: GTGCACCCCAATGTGATCTG<br>Reverse: TGCACTTGTAGCGGGTTCCT   |
| <i>AKR1C1</i>  | NM_001353.6                                                                    | Forward: TGGGAGGCCGTGGAGAA<br>Reverse: GGACACCCCGATGGACTTG       |
| <i>NQO1</i>    | NM_001025434.2,NM_001286137.2,NM_001025433.2,<br>NM_000903.3                   | Forward: CAGCAGACGCCCCAATTC<br>Reverse: TGGTGTCTCATCCCAAATATTCTC |
| <i>GCLC</i>    | NM_001498                                                                      | Forward: GATGCTGTCTTGCAGGGAATG<br>Reverse: AGCGAGCTCCGTGCTGTT    |
| <i>GAPDH</i>   | NM_002046                                                                      | Forward: CCTCCCGCTTCGCTCTCT<br>Reverse: CTGGCGACGAAAAGAAGA       |
| <i>B-ACTIN</i> | NM 001101.3                                                                    | Forward: GAGCACAGAGCCTCGCCTTT<br>Reverse: TCATCATCCATGGTGAGCTGG  |
| <i>NRF2</i>    | NM_006164.4, NM_001145412.3, NM_001145413.3,<br>NM_001313900.1, NM_001313901.1 | Forward: AGCCCAGCACATCCAGTCA<br>Reverse: TGTGGGCAACCTGGGAGTAG    |

All primers are from Sigma-Aldrich.
